# Supplementary material for: Association of Sugary Beverage Consumption With Mortality Risk in US Adults: A Secondary Analysis of Data From the REGARDS Study
Source: PubMed Central journal article supplement (PMC6537924; doi:10.1001/jamanetworkopen.2019.3121), 2019-05-17
Supplement: jamanetwopen-2-e193121-s001.pdf [file jamanetwopen-2-e193121-s001.pdf]

## Supplementary Online Content

Collin LJ, Judd S, Safford M, Vaccarino V, Welsh JA. Association of sugary beverage consumption with mortality risk in US adults: a secondary analysis of data from the REGARDS study. *JAMA Netw Open*. 2019;2(5):e193121. doi:10.1001/jamanetworkopen.2019.3121

**eTable 1.** Comparison of REGARDS Participants With Dietary Data (and Included in Current Study) and Those Excluded Owing to Lack of Dietary Data

**eTable 2.** Association of Each Additional 12 oz of Sugary Beverages Consumed With CHD-Related Mortality Among US Adults >45 Years in the REGARDS Study by Sex, Race, Education, and Weight Status

This supplementary material has been provided by the authors to give readers additional information about their work.

**eTable 1.** Comparison of REGARDS Participants With Dietary Data (and Included in Current Study) and Those Excluded Owing to Lack of Dietary Data

|                            | Study Sample (w/FFA) |      | Excluded (No FFQ) |      |
|----------------------------|----------------------|------|-------------------|------|
|                            | N                    | %    | N                 | %    |
| <b>All</b>                 | 13440                | 100  | 4490              | 100  |
| <b>Age</b>                 |                      |      |                   |      |
| 45-54                      | 1937                 | 14.4 | 873               | 19.4 |
| 55-64                      | 5625                 | 41.9 | 1768              | 39.4 |
| >65                        | 5878                 | 43.7 | 1849              | 41.2 |
| <b>Gender</b>              |                      |      |                   |      |
| Male                       | 7972                 | 59.3 | 2010              | 44.8 |
| Female                     | 5468                 | 40.7 | 2480              | 55.2 |
| <b>Race</b>                |                      |      |                   |      |
| White                      | 9266                 | 68.9 | 1857              | 41.4 |
| Black                      | 4174                 | 31.1 | 2633              | 58.6 |
| <b>Education</b>           |                      |      |                   |      |
| <High School               | 954                  | 7.1  | 694               | 15.5 |
| High School                | 3265                 | 24.3 | 1143              | 25.5 |
| Some College               | 3696                 | 27.5 | 1190              | 26.5 |
| College or more            | 5519                 | 41.1 | 1461              | 32.6 |
| <b>Income</b>              |                      |      |                   |      |
| <\$20,000                  | 1708                 | 12.7 | 893               | 19.9 |
| \$20,000-\$35,000          | 3051                 | 22.7 | 1027              | 22.9 |
| \$35,000-\$75,000          | 4417                 | 32.9 | 1280              | 28.5 |
| >\$75,000                  | 2707                 | 20.1 | 729               | 16.2 |
| refused                    | 1557                 | 11.6 | 561               | 12.5 |
| <b>Weight status</b>       |                      |      |                   |      |
| Underweight                | 152                  | 1.1  | 53                | 1.2  |
| Normal                     | 3744                 | 28   | 1077              | 24.1 |
| Overweight                 | 5182                 | 38.7 | 1619              | 36.2 |
| Obese                      | 4300                 | 32.1 | 1719              | 38.5 |
| <b>Physical activity</b>   |                      |      |                   |      |
| Inactive                   | 3997                 | 30.1 | 1505              | 34.1 |
| 1-3 times/week             | 5113                 | 38.6 | 1585              | 35.9 |
| ≥4 times/week              | 4151                 | 31.3 | 1323              | 30.0 |
| <b>Alcohol consumption</b> |                      |      |                   |      |
| None                       | 7396                 | 55.9 | 2860              | 65.2 |
| Moderate                   | 5144                 | 38.9 | 1362              | 31.1 |
| Heavy                      | 684                  | 5.2  | 163               | 3.7  |
| <b>Smoking</b>             |                      |      |                   |      |

|         |      |      |      |      |
|---------|------|------|------|------|
| Current | 1805 | 13.5 | 753  | 16.9 |
| Former  | 5136 | 38.4 | 2175 | 48.7 |
| Never   | 6448 | 48.2 | 1542 | 34.5 |

**eTable 2.** Association of Each Additional 12 oz of Sugary Beverages Consumed with CHD-Related Mortality among US Adults >45 Years in the REGARDS Study by Sex, Race, Education, and Weight Status<sup>a</sup>

|                                                                                                                                                                                 | SSB |           |                      | 100% Juice Only |           |                      |
|---------------------------------------------------------------------------------------------------------------------------------------------------------------------------------|-----|-----------|----------------------|-----------------|-----------|----------------------|
|                                                                                                                                                                                 | CHD |           |                      | CHD             |           |                      |
|                                                                                                                                                                                 | HR  | 95% CI    | p-value <sup>b</sup> | HR              | 95% CI    | p-value <sup>b</sup> |
| <b>All</b>                                                                                                                                                                      | 1.1 | 0.89–1.38 | NA                   | 1.3             | 0.95–1.74 | NA                   |
| <b>Race</b>                                                                                                                                                                     |     |           |                      |                 |           |                      |
| White                                                                                                                                                                           | 1.2 | 0.92–1.66 | p=0.33               | 1.5             | 0.94–2.32 | p=0.45               |
| Black                                                                                                                                                                           | 1.0 | 0.74–1.37 |                      | 1.2             | 0.77–1.76 |                      |
| <b>Sex</b>                                                                                                                                                                      |     |           |                      |                 |           |                      |
| Male                                                                                                                                                                            | 1.2 | 0.86–1.59 | p=0.64               | 1.3             | 1.09–1.62 | p=0.38               |
| Female                                                                                                                                                                          | 1.1 | 0.80–1.42 |                      | 1.2             | 1.00–1.41 |                      |
| <b>Education</b>                                                                                                                                                                |     |           |                      |                 |           |                      |
| ≤High School                                                                                                                                                                    | 1.3 | 1.00–1.63 | p=0.08               | 1.3             | 0.86–1.94 | p=0.90               |
| ≥College                                                                                                                                                                        | 0.9 | 0.61–1.27 |                      | 0.3             | 0.82–1.94 |                      |
| <b>Overweight</b>                                                                                                                                                               |     |           |                      |                 |           |                      |
| No                                                                                                                                                                              | 1.0 | 0.66–1.49 | p=0.49               | 0.9             | 0.51–1.72 | p=0.21               |
| Yes                                                                                                                                                                             | 1.2 | 0.91–1.49 |                      | 1.5             | 1.03–2.06 |                      |
| <sup>a</sup> All models controlled for each of the other potential modifiers plus age, physical activity, alcohol consumption, smoking history, saturated fat intake, and fiber |     |           |                      |                 |           |                      |
| <sup>b</sup> P-value for test of interaction between factor and effect of sugary beverages on outcome                                                                           |     |           |                      |                 |           |                      |
